# Supplementary material for: Interplay between the Westerlies and Asian monsoon recorded in Lake Qinghai sediments since 32 ka
Source: PubMed Central journal article supplement — Sci Rep. 2012 Aug 31;2:619. doi: 10.1038/srep00619 (PMC3431539; doi:10.1038/srep00619), 2012-08-31
Supplement: srep00619-s1.pdf [file srep00619-s1.pdf]

## **Supplementary Information**

### **Interplay between the Westerlies and Asian monsoon recorded in Lake Qinghai sediments since 32 ka**

An Zhisheng<sup>1,2\*</sup>, Steven M. Colman<sup>3</sup>, Weijian Zhou<sup>1</sup>, Xiaoqiang Li<sup>1</sup>, Eric T. Brown<sup>3</sup>, A. J. Timothy Jull<sup>4</sup>, Yanjun Cai<sup>1</sup>, Yongsong Huang<sup>5</sup>, Xuefeng Lu<sup>1</sup>, Hong Chang<sup>1</sup>, Yougui Song<sup>1</sup>, Youbin Sun<sup>1</sup>, Hai Xu<sup>1</sup>, Weiguo Liu<sup>1</sup>, Zhangdong Jin<sup>1</sup>, Xiaodong Liu<sup>1</sup>, Peng Cheng<sup>1</sup>, Yu Liu<sup>1</sup>, Li Ai<sup>1</sup>, Xiangzhong Li<sup>1</sup>, Xiuju Liu<sup>3</sup>, Libin Yan<sup>1</sup>, Zhengguo Shi<sup>1</sup>, Xulong Wang<sup>1</sup>, Feng Wu<sup>1</sup>, Xiaoke Qiang<sup>1</sup>, Jibao Dong<sup>1</sup>, Fengyan Lu<sup>1</sup>, Xinwen Xu<sup>1</sup>

<sup>1</sup> State Key Laboratory of Loess and Quaternary Geology, Institute of Earth Environment, Chinese Academy of Sciences, Xi'an, 710075, China;

<sup>2</sup> Department of Environmental Science & Engineering, Fudan University, Shanghai 200433, China

<sup>3</sup> Large Lakes Observatory and Department of Geological Sciences, University of Minnesota Duluth, Duluth, MN 55812, USA;

<sup>4</sup> NSF Arizona AMS Facility, University of Arizona, Tucson, AZ 85721, USA;

<sup>5</sup> Department of Geological Sciences, Brown University, Providence, Rhode Island 02912, USA

\*Corresponding author: [anzs@loess.llqg.ac.cn](mailto:anzs@loess.llqg.ac.cn)

## Supplementary Figures

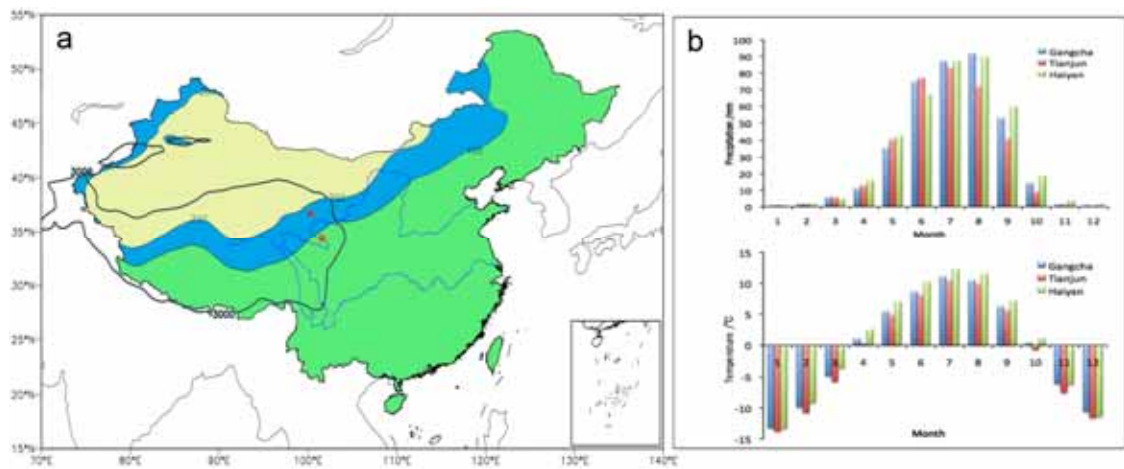

**Fig. S1 a)** Distribution of modern monsoonal and arid/semi-arid areas in China. The blue shaded area denotes the transitional/semi-arid zone between humid (green, controlled by the Asian monsoon) and arid inland areas (yellow, influenced by the Westerlies) in China, where the mean annual precipitation is 200-400 mm (S1). The black contour shows the extent of the Tibetan Plateau above the elevation of 3000 m. The red triangle and red circle show the locations of Lake Qinghai, and Xiannv cave (34°27'N, 101°26'E, elevation 3730 m, ~250 km southeast of Lake Qinghai), respectively. **b)** Mean monthly precipitation and temperature averaged for 1976-2007 from three meteorological stations within the Lake Qinghai catchment (Gangcha, 37°19'N, 100°10'E; Tianjun, 37°17'N, 99°2'E; Haiyan, 36°53'N, 100°59'E). Mean annual precipitation is dominated by precipitation in June, July and August, which make up about 65% of the total of 373 mm, showing the clear seasonality of monsoonal precipitation. The mean annual temperature of three stations is  $\sim -0.1$  .

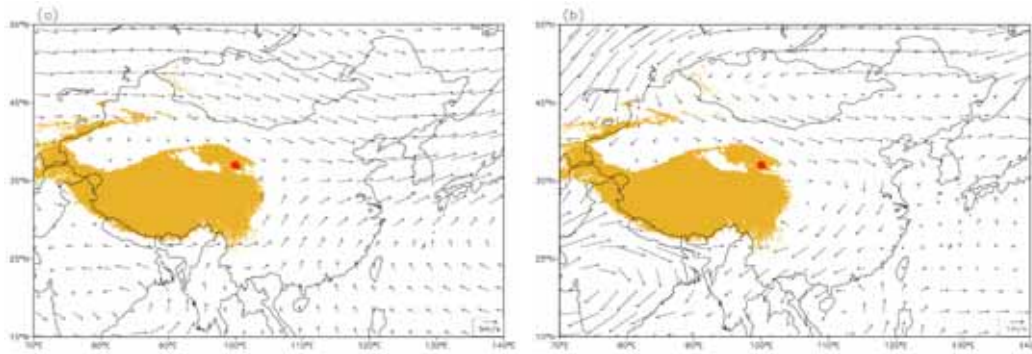

**Fig. S2 a)** 700 hPa wind fields in summer (JJA) during the pre-industrial (PI) period based on the CCSM3 modeling output in the framework of PMIP2 (S2). The results show that the summer monsoon reached Lake Qinghai in PI summer; **b)** Difference of CCSM3-simulated 700 hPa wind fields between LGM and PI summers, showing a weakened Asian summer monsoon and a strengthened Westerly wind around Lake Qinghai in LGM summer compared with the PI summer. Red solid circles represent the location of Lake Qinghai. The elevations of yellow areas exceed 3000 m.

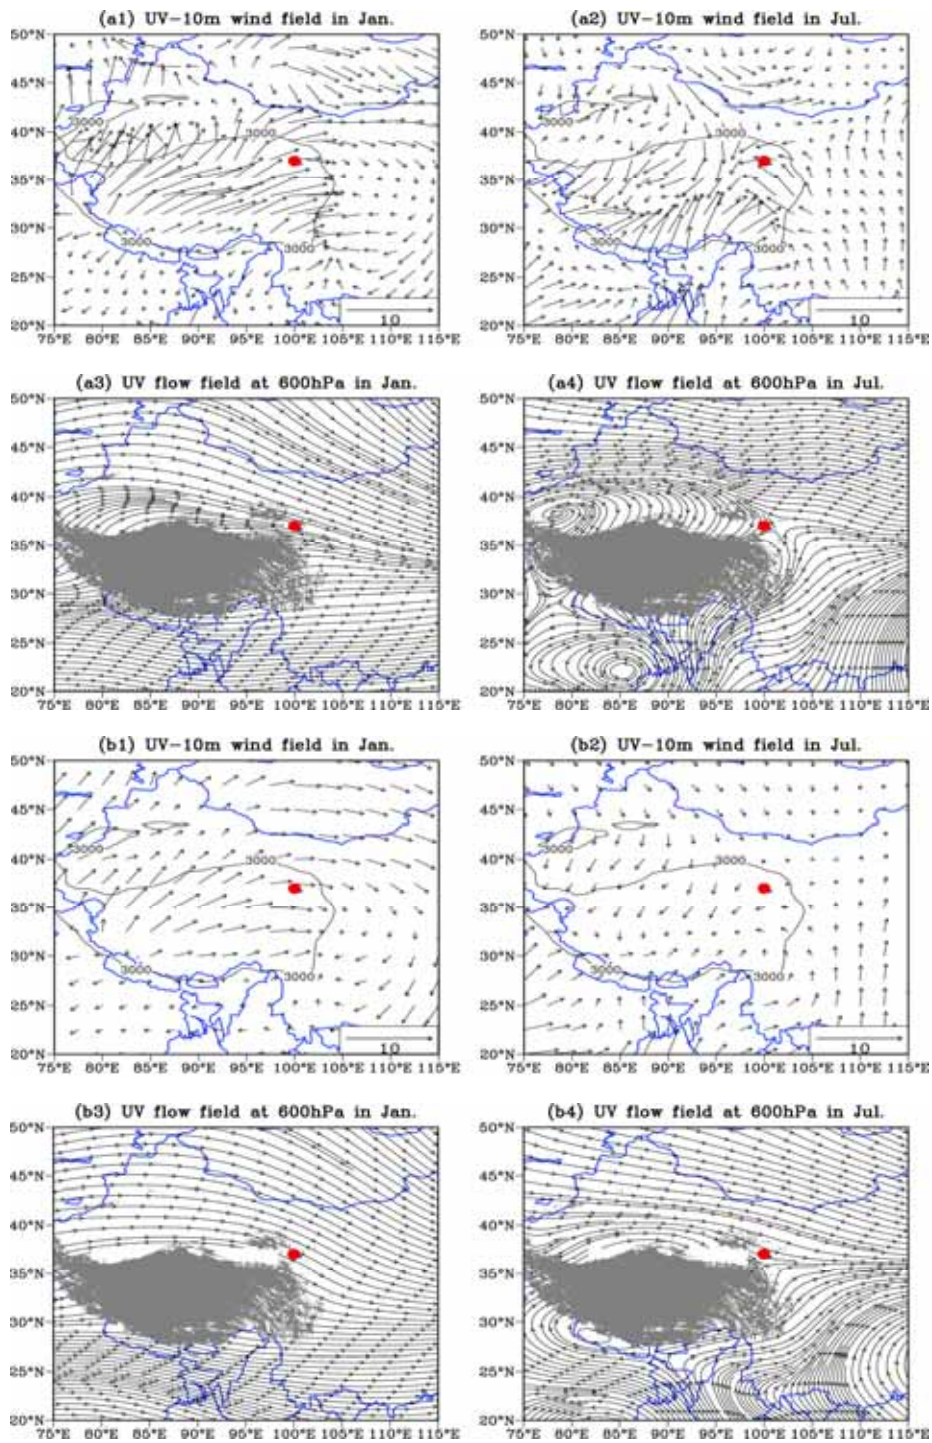

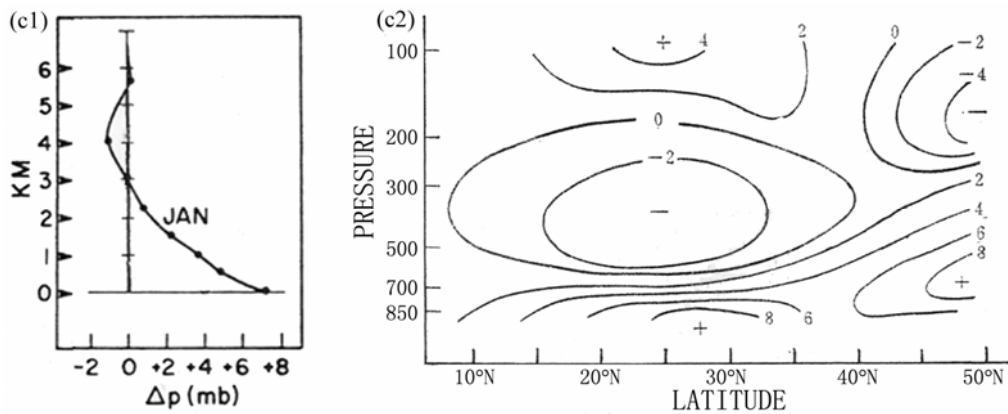

**Fig. S3** Averaged surface 10-meter wind fields (a1, a2) and flow fields at 600 hPa (a3, a4) in Jan. (a1, a3) and in Jul. (a2, a4) from 1971 to 2000 (S3). Averaged surface 10-meter wind fields (b1, b2) and flow fields at 600 hPa (b3, b4) in Jan. (b1, b3) and in Jul. (b2, b4) during the LGM from PMIP2 (S2). Red solid circle indicates the location of Lake Qinghai (36°32'-37°15'N, 99°36'-100°47'E, elevation 3194 m). The black contour in (a1-2, b1-2) denotes elevation of 3000 meters. The grey shaded area in (a3-4, b3-4) indicates the region where the elevation exceeds 4000 meters. (c1): Vertical profile of summed-up pressure differentials ( $\Delta P^*$ ) across the Tibetan Plateau (positive corresponds to eastward pressure torque on the atmosphere). Modified after Fig.1 by Newton (1971) (S4). (c2): Temperature difference between the eastern and western sides of the Tibetan Plateau in March ( $T_{60^\circ E} - T_{120^\circ E}$ ). Units of  $^\circ C$ , ordinate in log-pressure, abscissa in latitude. Modified after Fig. 13.10 by Ye and Gao, et al. (1979) (S5).

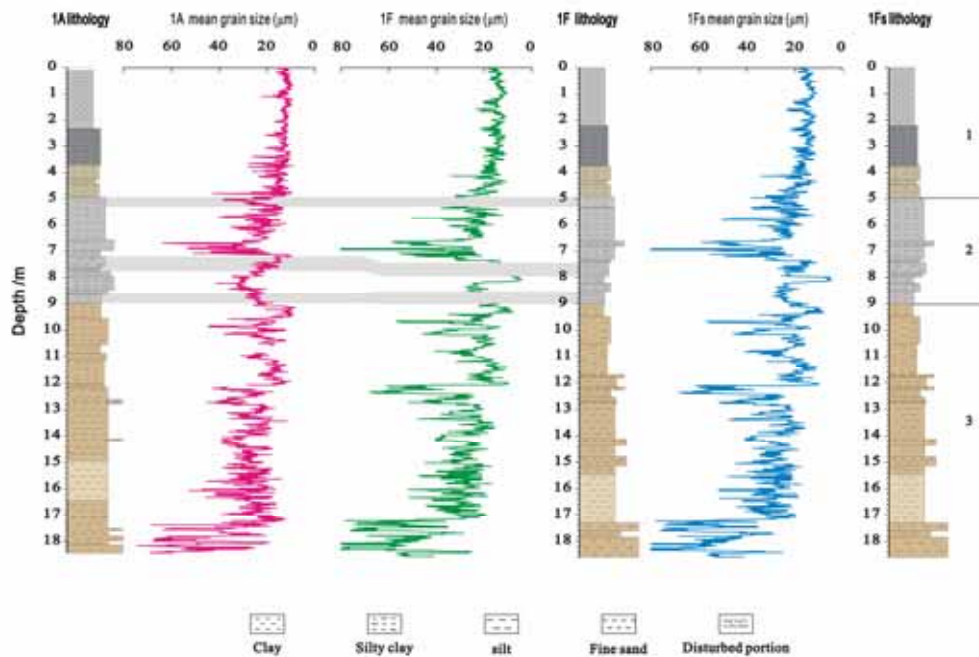

**Fig. S4** Comparison of lithology and mean grain size of cores 1A and 1F and the composite core 1Fs. Following conventional methods, we calibrated core depth with the wire length, and then built calibrated depths for our cores. Because parts of core 1F were disturbed or mixed by drilling mud, we discarded these portions. According to comparisons of lithology and curves of mean grain size between cores 1F and 1A, we replaced the disturbed portions of 1F (4.93-5.29, 7.42-7.96 and 8.54-8.98 m) by the equivalent portions of the parallel core 1A (4.94-5.28, 7.19-7.76 and 8.61-8.98 m), and constructed a composite column (1Fs). Horizontal gray bars between cores mark the zones of disturbed sediments in core 1F and corresponding portions of core 1A. Gray lines and numbers to the right of 1Fs indicate generalized lithologic units. 1: 0–4.99 m, dark gray to light brown lacustrine silty clay or clay with horizontal beddings; 2: 4.99–9.01 m, gray and gray-yellowish silty clay with silt layers; 3: 9.01–18.61 m, light brown and gray silty clay, loess-like silt and fine sand layers in the lower part.

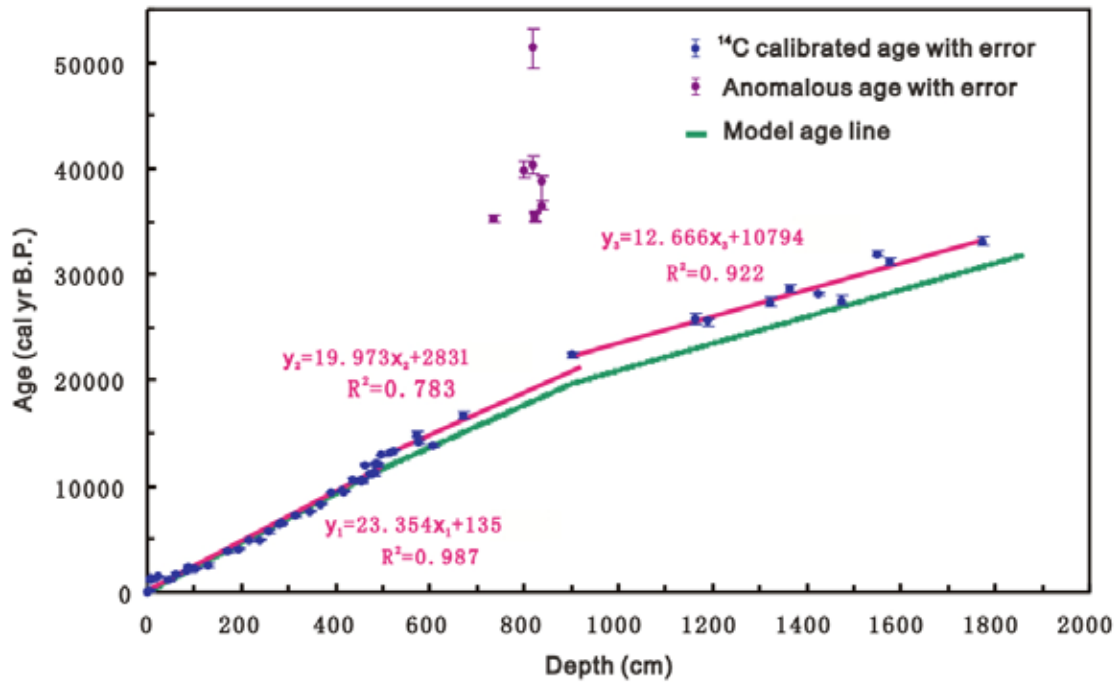

**Fig S5.** The relationship between calibrated  $^{14}\text{C}$  age and depth. The anomalous data points in purple were not used in establishing the chronology (see Materials and Methods for interpretation and model description).



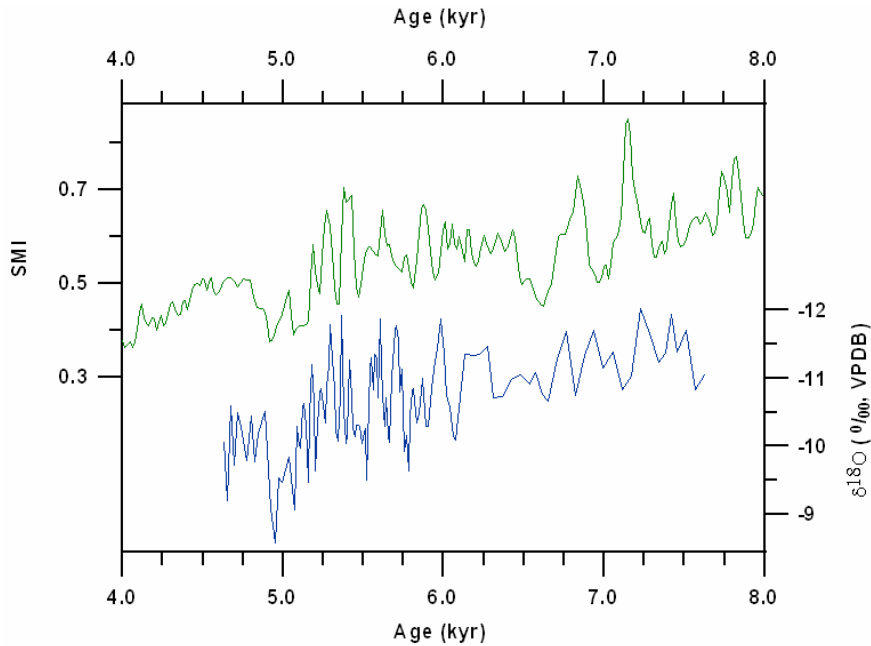

**Fig. S6** Comparison of SMI for core 1Fs (green, summer monsoon index, a nondimensional index derived from normalized and averaged  $\text{CaCO}_3$  and TOC flux--see detail in the text) and  $\delta^{18}\text{O}$  of the Xiannv Cave (blue, S6). The Xiannv Cave speleothem record has an independent timescale provided by ICP-MS  $^{230}\text{Th}$  ages from isotope laboratory of University of Minnesota. When we adjusted the SMI profile 150 yrs younger than our model time scale, these two records show a remarkable resemblance during the period of 4.6-7.6 ka (the correlation coefficient increased from 0.42 to 0.47 after adjustment), indicating that the reservoir effect on  $^{14}\text{C}$  ages in our record for this time interval is likely a little older than the mean reservoir age (135 yrs) for the Holocene (Fig. 2). This comparison implies that fluctuations in the reservoir effect may exist on shorter time scales, while 135 yrs represent an average estimate of the reservoir effect for the whole Holocene. This comparison also supports our chronology and suggests that the Holocene reservoir age of Lake Qinghai sediments is not more than 1000 yrs as previously suggested (S7).



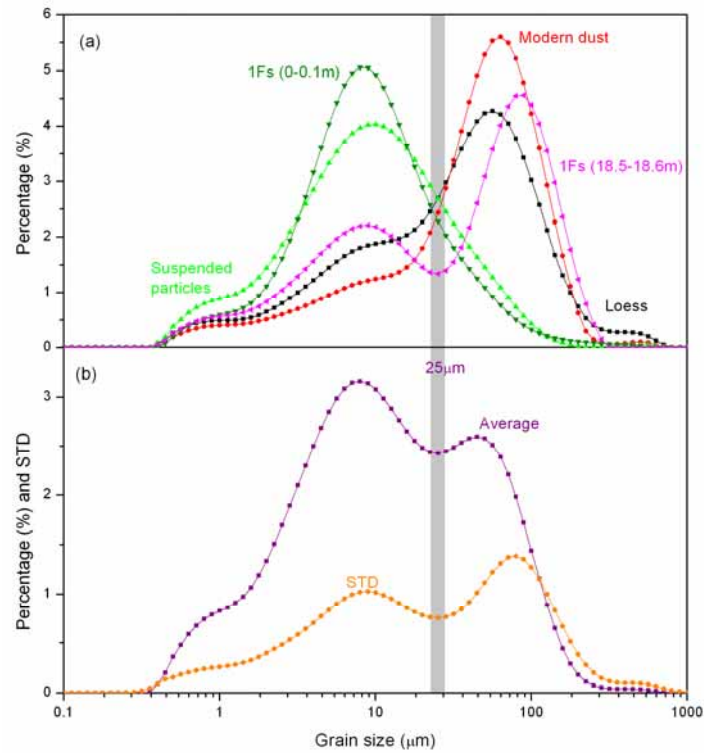

**Fig. S7 a)** Grain size distributions of modern dust (red), suspended particles from the Buha River (light green), eolian loess (black) from the area surrounding Lake Qinghai, top 10 cm lacustrine sediments (dark green), and bottom 10 cm loess-like sediments (pink) of core 1Fs; **b)** Distribution patterns of averaged percentage (purple) and standard deviations (orange) of each grain size class for all samples from core 1Fs. Gray bar at 25 μm indicates the boundary between fine and coarse populations, taken as the threshold between the dominance of riverine and eolian contributions to lake sediments.

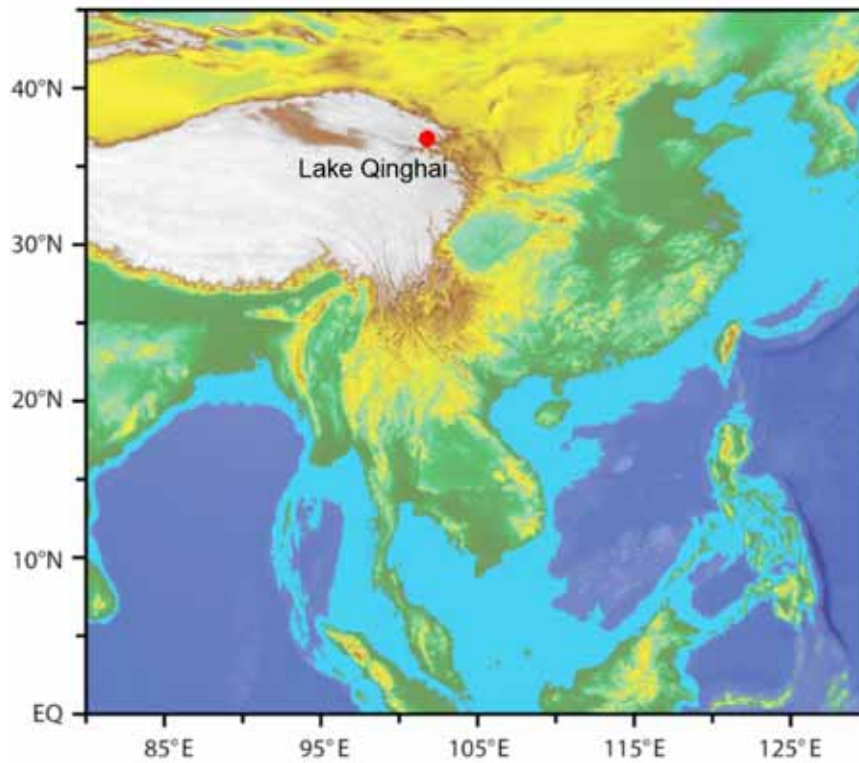

**Fig. S8** Regional relief of southeastern Asia (GTOPO30 data distributed by U.S. Geological Survey's EROS Data Center). Light blue denotes areas of marginal seas emergent during the LGM when the sea level was ~130 m lower than present. It also demonstrates that the coastline in eastern China shifted eastward by ~1000 km during the LGM (S8).

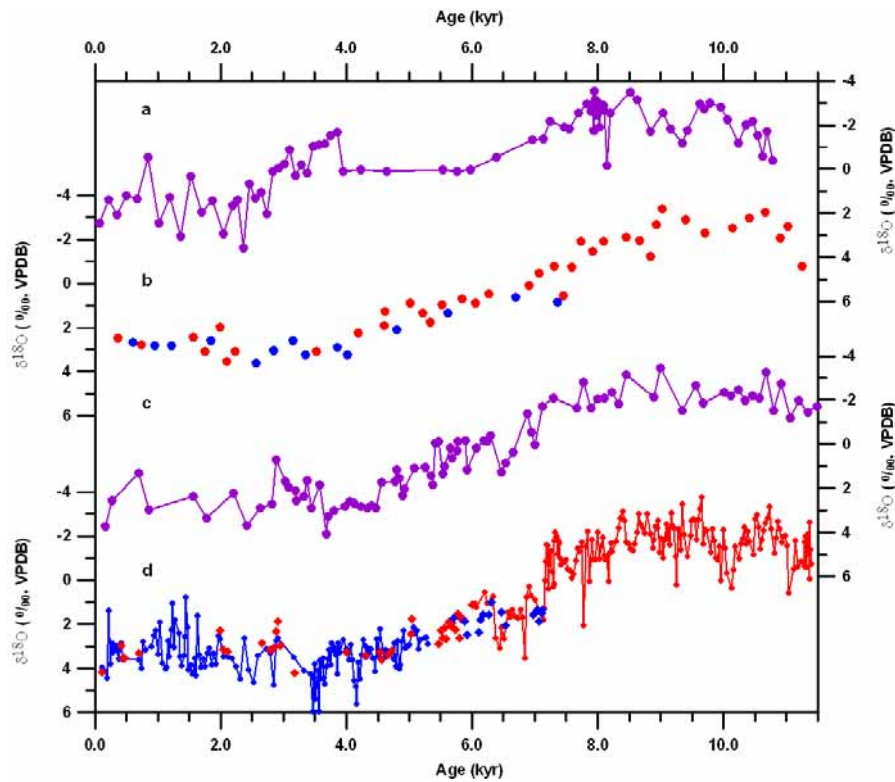

**Fig. S9** Comparisons among ostracod  $\delta^{18}\text{O}$  results from Lake Qinghai sediments. **a)** Zhang et al., 1994 (S9); **b)** Lister et al., 1991 (S10); **c)** Liu et al., 2007 (S11); **d)** this study. Blue indicates *L. inopinata* and red for *E. mareotica*. Purple shows ostracod  $\delta^{18}\text{O}$  without species classification. We subtracted 135 yr (the Holocene reservoir effect estimated here) from calibrated ages (by CALIB 510 (S12)), which were derived from the original conventional radiocarbon ages (S13) in cores QH85-16A, QH85-14B, and QH2000, respectively, and then established the sample ages by linear interpolation for curves **a**, **b** and **c**. Our high resolution ostracod  $\delta^{18}\text{O}$  curve shows a similar trend to all curves mentioned above but with more detail.

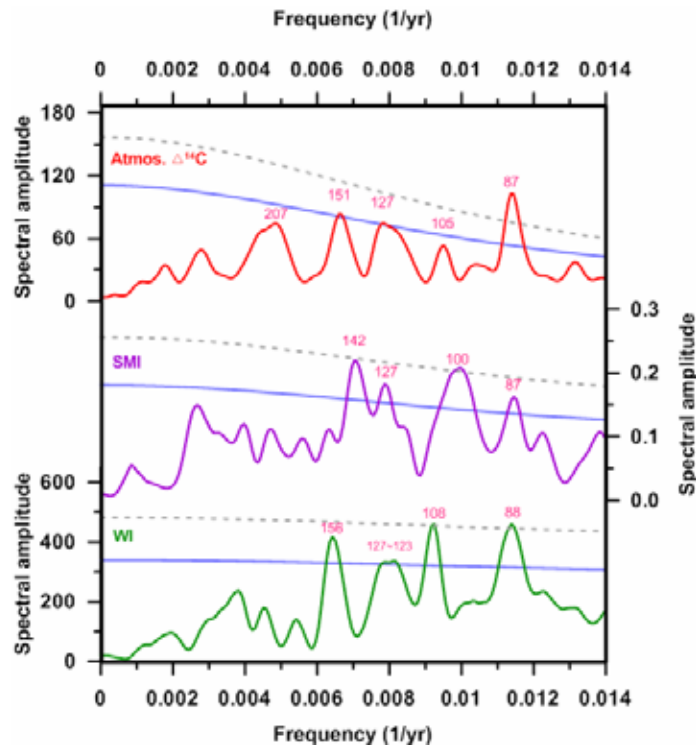

**Fig. S10** Power spectra of atmospheric  $\Delta^{14}\text{C}$ , Asian summer monsoon index (SMI) and Westerlies climate index (WI, flux of  $> 25 \mu\text{m}$  fraction) for core 1Fs during the last 11.5 ka. Blue and grey dashed lines are 90% and 99% significance levels, respectively. The spectra were obtained using REDFIT software (S14). The number of Welch-overlapped-segment-averaging is 6, OFAC is 4 and HIFAC is 1. All data were detrended using a first-difference filter to emphasize the high frequency component of the spectra.

## Supplementary Text

### **Text S1: The indications of a minor role of the winter monsoon on the Lake Qinghai area**

Diagnoses of modern climatological data for the Lake Qinghai area, based on the NCEP/NCAR reanalysis (S3), show that the Westerlies are predominant in the 10 m wind field in January (Fig. S3-a1) over Lake Qinghai and the Asian summer monsoon prevails in July (Fig. S3-a2). These observations are consistent with the results from ECWMF data (S15, Figs not shown). Comparison between the 10 m wind fields in January and July shows that the boundary between the winter monsoon and the summer monsoon mainly occurs over the low-elevation regions of central and eastern China. This situation contrasts with that at Lake Qinghai (3194m), which is under the influence of westerly winds rather than the winter monsoon in January, and under the influence of the summer monsoon in July. The 600 hPa wind flow fields (approx. 800m above Lake Qinghai) also demonstrate that west is the dominant wind direction in January (Fig. S3-a3) and that the Asian summer monsoon prevails in July (Fig. S3-a4). Furthermore, modeling results from PMIP2 indicate that the 10 m wind fields (Fig. S3-b1 and b2) and the 600 hPa wind flow fields (Fig. S3-b3 and b4) during the LGM are basically similar to those of modern time.

Previous studies have demonstrated that 700 hPa (approx. 3000 m) is a threshold altitude for contrasts in temperature and pressure between the east and west sides of the Tibetan Plateau. Below this threshold altitude, the winter monsoon (associated with the shallow Siberian High) has a large impact on winter wind fields, whereas above this altitude, the Westerlies are the predominant wind system (S4, S5, S16).

Newton (Fig. S3-c1, S4, S16) first showed that the wind torque due to the huge mass of the Tibetan Plateau changes sign at an altitude of about 3 km in winter, implying that below this altitude, the pressure of the eastern side of the plateau is higher than that of the western side due to the prevalence of the high-pressure winter monsoon.

Shon and Li (Fig. S3-c2, S5) calculated the temperature difference between the eastern and the western sides of the plateau. They found that below an altitude of

approximately 3 km, temperature of the eastern side ( $T_{120^{\circ}\text{E}}$ ) is colder than that of the western side ( $T_{60^{\circ}\text{E}}$ ) due to the intrusion of the cold-temperature northerly winter monsoon. These contrasts may be attributed to the fact that the Siberian High (Asian winter monsoon) is a shallow system, and they also imply that wind torque over the mountain results from thermal, as well as the mechanical, effects.

These data demonstrate that during both modern times and the LGM, the Westerlies are the predominant wind direction over Lake Qinghai in winter, while the shallow winter monsoon system only prevails over the low-elevation regions of central and eastern China. In contrast, the Asian summer monsoon can reach and influence the region of Lake Qinghai in summer.

## Supplementary Tables

**Table S1:** Age data obtained from the cores 1F and 1A of Lake Qinghai

| Lab Code | Depth (cm) | Date material | <sup>14</sup> C age |            | Calibrated age (cal yr BP) |       |        |
|----------|------------|---------------|---------------------|------------|----------------------------|-------|--------|
|          |            |               | (yr BP)             | Error (yr) | Lower                      | Upper | Median |
| AA78739  | 1          | TOC           | 30                  | 30         | 30                         | 140   | 60     |
| AA78740  | 5          | TOC           | 200                 | 35         | 80                         | 310   | 180    |
| XA2718   | 8          | TOC           | 1210                | 40         | 1060                       | 1260  | 1140   |
| XA1748   | 9          | TOC           | 1430                | 30         | 1290                       | 1380  | 1330   |
| XA2730   | 21         | TOC           | 1550                | 20         | 1390                       | 1520  | 1470   |
| XA2771   | 44         | TOC           | 1220                | 40         | 1060                       | 1270  | 1150   |
| XA2770   | 62         | TOC           | 1780                | 40         | 1570                       | 1820  | 1700   |
| XA2769   | 83         | TOC           | 2000                | 40         | 1870                       | 2060  | 1950   |
| XA2721   | 86         | TOC           | 2310                | 30         | 2190                       | 2360  | 2340   |
| XA2711   | 104        | TOC           | 2180                | 20         | 2130                       | 2310  | 2240   |
| XA2768   | 128        | TOC           | 2470                | 40         | 2360                       | 2710  | 2560   |
| XA2766   | 171        | TOC           | 3565                | 40         | 3720                       | 3970  | 3865   |
| XA2713   | 194        | TOC           | 3740                | 20         | 3990                       | 4220  | 4110   |
| XA2765   | 215        | TOC           | 4340                | 40         | 4840                       | 5040  | 4920   |
| XA2764   | 238        | TOC           | 4380                | 40         | 4860                       | 5050  | 4940   |
| XA2763   | 257        | TOC           | 4990                | 50         | 5610                       | 5890  | 5720   |
| XA2700   | 282        | TOC           | 5570                | 20         | 6310                       | 6400  | 6350   |
| AA77753  | 284*       | TOC           | 5680                | 40         | 6350                       | 6600  | 6465   |
| XA1755   | 284*       | TOC           | 5735                | 40         | 6410                       | 6640  | 6530   |
| XA2762   | 316        | TOC           | 6270                | 40         | 7030                       | 7270  | 7210   |
| XA2759   | 344        | TOC           | 6780                | 55         | 7520                       | 7720  | 7630   |
| XA2758   | 368        | TOC           | 7510                | 40         | 8200                       | 8400  | 8335   |
| XA2716   | 391        | TOC           | 8450                | 30         | 9440                       | 9530  | 9485   |
| XA2757   | 412        | TOC           | 8600                | 50         | 9500                       | 9680  | 9560   |
| XA1756   | 413*       | TOC           | 8600                | 40         | 9500                       | 9670  | 9550   |
| AA77758  | 413*       | TOC           | 8560                | 50         | 9470                       | 9660  | 9530   |
| AA77711  | 416        | seed          | 8540                | 50         | 9470                       | 9580  | 9520   |
| XA2756   | 434        | TOC           | 9430                | 50         | 10520                      | 11060 | 10660  |
| AA77712  | 454        | seed          | 9280                | 50         | 10280                      | 10580 | 10460  |
| XA2755   | 455        | TOC           | 9370                | 50         | 10430                      | 10720 | 10590  |
| AA77760  | 456        | TOC           | 9410                | 60         | 10430                      | 11060 | 10640  |
| XA3200   | 463        | TOC           | 10235               | 30         | 11830                      | 12080 | 11990  |
| XA1586   | 475*       | seed          | 9670                | 40         | 10790                      | 11200 | 11110  |



|         |      |               |       |     |       |       |       |
|---------|------|---------------|-------|-----|-------|-------|-------|
| XA1751  | 475* | seed          | 9790  | 40  | 11170 | 11250 | 11215 |
| AA77708 | 475* | seed          | 9700  | 60  | 10790 | 11240 | 11120 |
| AA78019 | 477  | TOC           | 9755  | 60  | 10880 | 11270 | 11190 |
| XA2701  | 480  | TOC           | 9900  | 45  | 11210 | 11590 | 11290 |
| AA77761 | 481  | TOC           | 9890  | 50  | 11200 | 11600 | 11290 |
| XA3195  | 485  | TOC           | 10290 | 30  | 11840 | 12230 | 12070 |
| XA3194  | 490  | TOC           | 10310 | 30  | 11990 | 12350 | 12100 |
| XA1752  | 497  | seed          | 11020 | 35  | 12880 | 13050 | 12940 |
| XA2754  | 514  | TOC           | 11280 | 60  | 13080 | 13270 | 13170 |
| XA3210  | 521  | TOC           | 11510 | 30  | 13270 | 13430 | 13350 |
| XA3226  | 572  | TOC           | 12630 | 40  | 14670 | 15130 | 14910 |
| XA2752  | 577  | TOC           | 12230 | 50  | 13920 | 14250 | 14090 |
| AA77765 | 605  | TOC           | 12010 | 60  | 13750 | 14000 | 13870 |
| XA3187  | 670  | plant residue | 14000 | 40  | 16310 | 17040 | 16680 |
| XA3186  | 736  | plant residue | 31350 | 110 | 34920 | 35620 | 35260 |
| XA2748  | 799  | TOC           | 34470 | 200 | 38980 | 40540 | 39810 |
| XA3228  | 817  | plant residue | 35170 | 205 | 39320 | 41010 | 40250 |
| XA2747  | 818  | TOC           | 47905 | 450 | 49990 | 53610 | 51530 |
| XA3185  | 823  | plant residue | 31490 | 110 | 35000 | 35780 | 35370 |
| XA3240  | 823  | plant residue | 31690 | 105 | 35230 | 36020 | 35550 |
| XA3184  | 838  | plant residue | 33620 | 140 | 38190 | 40460 | 38730 |
| XA3966  | 838  | plant residue | 32230 | 130 | 35980 | 36860 | 36440 |
| AA78823 | 901  | TOC           | 18820 | 130 | 22130 | 22590 | 22360 |
| XA3229  | 1162 | TOC           | 21680 | 70  | 25370 | 26420 | 25880 |
| XA3963  | 1189 | TOC           | 21190 | 70  | 25390 | 26000 | 25570 |
| XA2777  | 1323 | TOC           | 22620 | 100 | 26960 | 27730 | 27370 |
| XA2705  | 1363 | TOC           | 23900 | 90  | 28380 | 29150 | 28730 |
| XA2776  | 1425 | TOC           | 23350 | 160 | 27910 | 28330 | 28130 |
| XA2775  | 1473 | TOC           | 22810 | 100 | 27070 | 27880 | 27540 |
| AA77785 | 1550 | TOC           | 27250 | 335 | 31690 | 32200 | 31940 |
| XA2774  | 1574 | TOC           | 26330 | 150 | 30810 | 31510 | 31210 |
| AA77790 | 1773 | TOC           | 28670 | 300 | 32665 | 33605 | 33150 |

\*Average age of the same depth is used in establishing the age model.

Samples with shadow were collected from core 1A

**Table S2:** Comparison of dating results for core 1F and 1A in Lake Qinghai between Xi'an (XA) and Tucson NSF (AA) AMS facilities

| Lab Code   | Date material | Depth (cm) | <sup>14</sup> C age |            |
|------------|---------------|------------|---------------------|------------|
|            |               |            | (yr BP)             | Error (yr) |
| XA2700*    | TOC           | 282        | 5570                | 20         |
| XA1755**   | TOC           | 284        | 5735                | 40         |
| AA77753*** | TOC           | 284        | 5680                | 40         |
| XA2757*    | TOC           | 412        | 8600                | 50         |
| XA1756**   | TOC           | 413        | 8600                | 40         |
| AA77758*** | TOC           | 413        | 8560                | 50         |
| XA1586*    | seed          | 475        | 9670                | 40         |
| XA1751**   | seed          | 475        | 9790                | 40         |
| AA77708*** | seed          | 475        | 9700                | 60         |

\* Samples were pretreated and measured at Xi'an AMS Center

\*\* Samples were pretreated at NSF -AMS in Tucson and measured in Xi'an

\*\*\* Samples were pretreated and measured at NSF-AMS in Tucson

Samples with shadow were collected from core 1A

**Table S3:** Comparison of <sup>14</sup>C age for TOC and seeds at the similar depths from the upper 5.0 m of core 1F and 1A

| Lab Code  | Date material | Depth (cm) | <sup>14</sup> C age |            |
|-----------|---------------|------------|---------------------|------------|
|           |               |            | (yr BP)             | Error (yr) |
| AA77758** | TOC           | 413        | 8560                | 60         |
| AA77711** | seed          | 416        | 8540                | 50         |
| AA77712** | seed          | 454        | 9280                | 50         |
| XA2755*   | TOC           | 455        | 9370                | 50         |
| XA1751*   | seed          | 475        | 9790                | 40         |
| AA78019** | TOC           | 477        | 9755                | 60         |

\* Lab code of Xi'an AMS Center, China

\*\* Lab code of NSF-AMS lab in Tucson

Samples with shadow were collected from core 1A

**Table S4:**  $^{14}\text{C}$  dating results for surface sediment at the 1F core site, for living naked carp and algae.

| Lab code | Depth(cm) | Dating material                                         | $^{14}\text{C}$ age<br>(yr BP) |
|----------|-----------|---------------------------------------------------------|--------------------------------|
| AA78739  | 0-1       | TOC                                                     | 30±30                          |
| AA78728  |           | algae                                                   | post-bomb                      |
| AA78729  |           | algae                                                   | post-bomb                      |
| AA78730  |           | Living naked carp<br>( <i>Gymnocypris przewalskii</i> ) | post-bomb                      |

## References for Supplementary Materials:

- S1. An, Z. S. *et al.* Changes of the monsoon-arid environment in China and growth of the Tibetan Plateau since the Miocene. *Quatern. Sci.* **26**, 678-693 (2006) (in Chinese with English abstract).
- S2. Braconnot, P, *et al.* Results of PMIP2 coupled simulations of the Mid-Holocene and Last Glacial Maximum; Part 1: experiments and large-scale features. *Clim. Past* **3**, 261-277 (2007).
- S3. Kalnay, et al. The NCEP/NCAR 40-year reanalysis project. *Bull. Am. Meteor. Soc.* **77**, 437-470 (1996).
- S4. Newton, C. W. Mountain torques in the global angular momentum balance. *J. Atmos. Sci.* **28**, 623–628 (1971).
- S5. Ye, D. Z. & Gao, Y. X. The Meteorology of Qinghai Tibetan Plateau (Science Press, Beijing) (in Chinese) (1979).
- S6. Cai, Y. J., An, Z. S., Cheng, H., Edwards, R. L. & Tan, L. Climate changes in northeastern margin of Tibetan Plateau since 8ka BP --- The speleothem records AGU Fall meeting, San Francisco, CA. (2008).
- S7. Shen, J., Liu, X. Q., Wang, S. M. & Matsumoto, R. Palaeoclimatic changes in the Qinghai Lake area during the last 18,000 years. *Quatern. Int.* **136**, 131-140 (2005).
- S8. An, Z. S. et al. Paleomonsoons of China over the past 130,000 years—Paleomonsoons variation. *Sci. in China Ser. B* **34**, 1016-1024 (1991).
- S9. Zhang, P. X., Zhang, B. Z., Qian, G. M., Li, H. J. & Xu, L. M. The study of paleoclimatic parameter of Qinghai Lake since Holocene. *Quatern. Sci.* **3**, 225-238 (1994) (in Chinese with English abstract).
- S10. Lister, G. S., Kelts, K. R., Chen, K. Z., Yu, J. Q. & Niessen, F. Lake Qinhai,

- China: Closed-basin lake levels and the oxygen isotope record for ostracoda since the latest Pleistocene. *Palaeogeogr. Palaeoclimatol. Palaeoecol.* **84**, 141-162 (1991).
- S11. Liu, X. Q., Shen, J., Wang, S. M., Wang, Y. B. & Liu, W. G. Southwest monsoon changes indicated by oxygen isotope of ostracode shells from sediments in Qinghai Lake since the late Glacial. *Chin. Sci. Bull.* **52**, 539-544 (2007).
- S12. Reimer, P. J. *et al.* IntCal04 terrestrial radiocarbon age calibration, 0–26 Cal kyr BP. *Radiocarbon* **46**, 1029-1058 (2004).
- S13. Colman, S. M., Yu, S. Y., An, Z. S., Shen, J. & Henderson, A. C. G. Late Cenozoic climate changes in China's western interior: a review of research on Lake Qinghai and comparison with other records. *Quatern. Sci. Rev.* **26**, 2281-2300 (2007).
- S14. Schulz, M. & Mudelsee M. REDFIT: estimating red-noise spectra directly from unevenly spaced paleoclimatic time series. *Comput. Geosci.* **28**, 421- 426 (2002).
- S15. ECMWF ERA-40 data used in this study/project have been provided by ECMWF/have been obtained from the ECMWF Data Server.
- S16. Newton, C. W. Global angular momentum balance: earth torques and atmospheric fluxes. *J. Atmos. Sci.* **28**, 1329–1341(1971).
